# Supplementary material
Source: PubMed Central journal article supplement (PMC8119227)
Supplement: NIHMS1692497-supplement-Supplementary_Material.pdf [file NIHMS1692497-supplement-Supplementary_Material.pdf]

## Supplementary Material

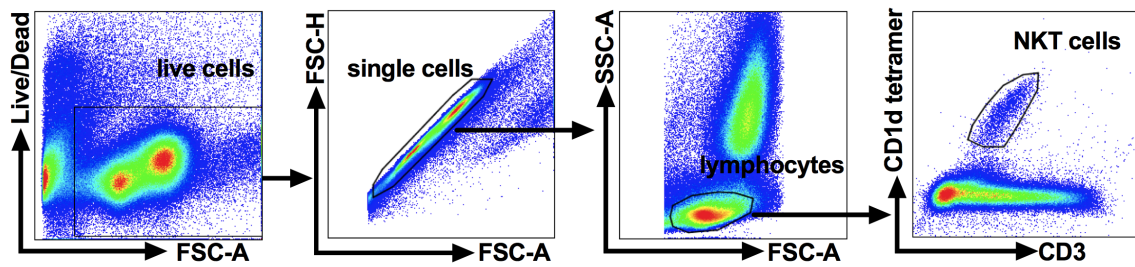

**Supplemental Figure 1.** Representative blood sample showing gating strategy used to identify iNKT cells. iNKT cells were identified by sequentially gating on Live/Dead negative cells, the lymphocyte singlet population, and then CD3<sup>+</sup> and CD1d tetramer<sup>+</sup> cells. FSC, forward scatter; SSC, side scatter; A, signal area; H, signal height.

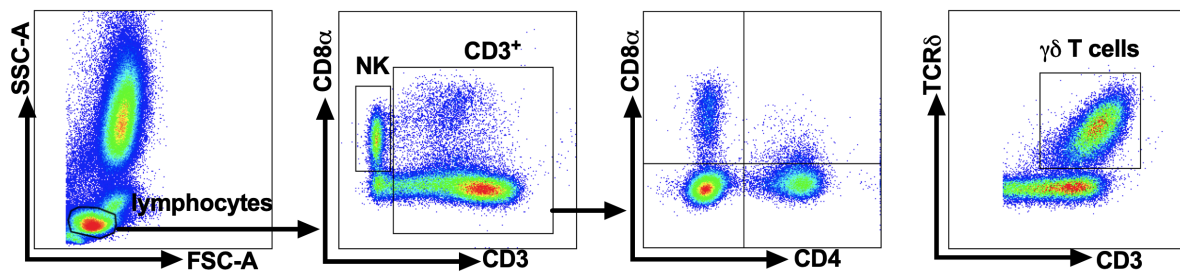

**Supplemental Figure 2.** Representative blood sample showing gating strategy to identify immune cells. T cells were identified as CD3<sup>+</sup> cells after first gating on live single-celled, lymphocytes. NK cells were identified as CD8α<sup>+</sup> CD3<sup>-</sup> cells after gating single live lymphocytes. T cell subsets were distinguished according to surface expression of CD4, CD8α. γδ T cells were identified as TCRδ<sup>+</sup> after gating on CD3<sup>+</sup> T cells.

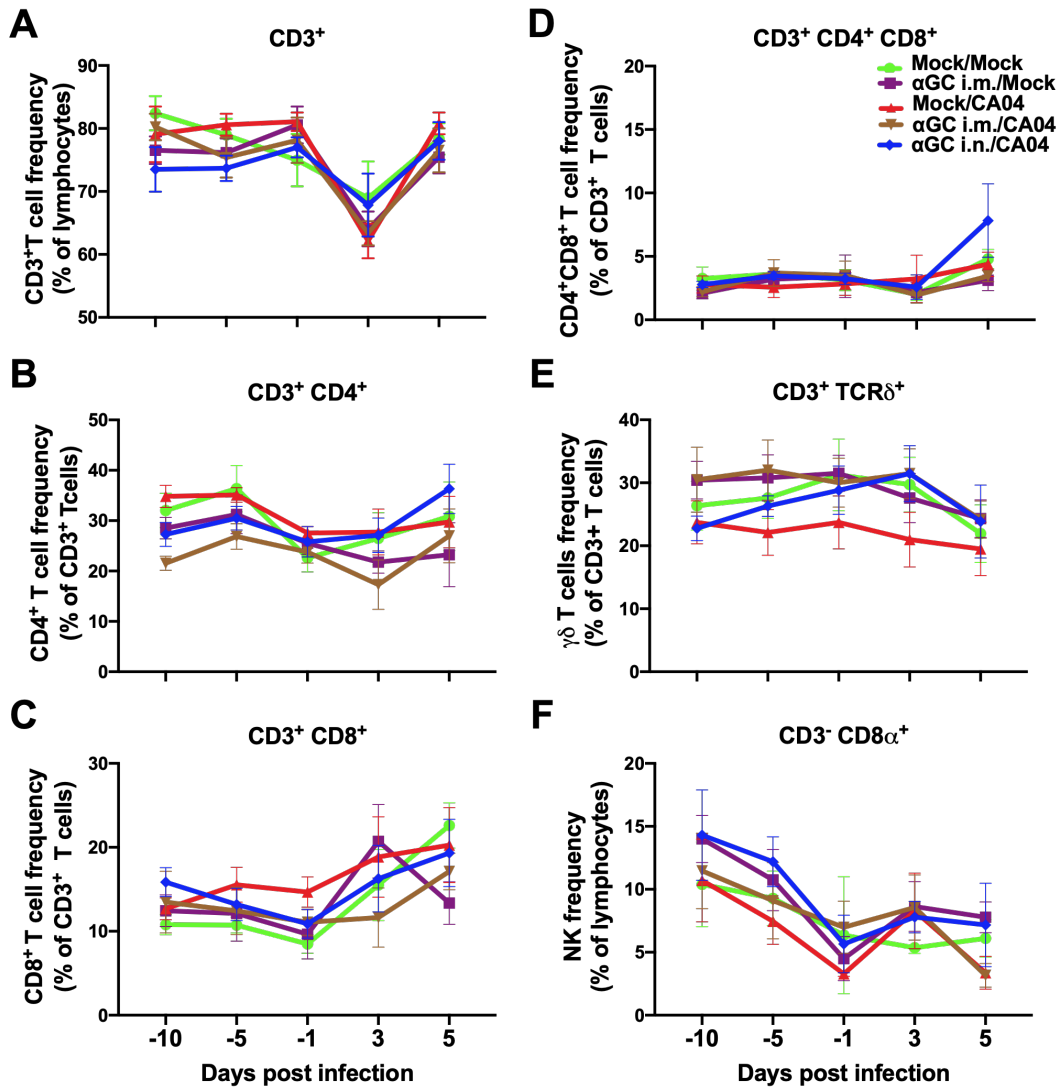

**Supplemental Figure 3.** Frequencies of immune cell populations in peripheral blood during Experiment 1 (A-F). (A) CD3<sup>+</sup> cells as a proportion of lymphocytes, (B) CD4<sup>+</sup> single positive T cells as a proportion of CD3<sup>+</sup> lymphocytes, (C) CD8 $\alpha$ <sup>+</sup> single positive T cells as a proportion of CD3<sup>+</sup> lymphocytes, (D) double positive CD4<sup>+</sup> CD8 $\alpha$ <sup>+</sup> T cells as a proportion of CD3<sup>+</sup> lymphocytes, (E)  $\gamma\delta$  T cells as a proportion of CD3<sup>+</sup> lymphocytes, (F) NK cells (CD3<sup>-</sup>CD8 $\alpha$ <sup>+</sup>) as a proportion of lymphocytes. Data are presented as mean  $\pm$  SEM. CD3<sup>+</sup>, CD4<sup>+</sup>, and  $\gamma\delta$  T cell frequencies were analyzed using a two-way ANOVA. Other cell types were compared at each time point using the non-parametric Kruskal-Wallis test. No statistical differences were identified.

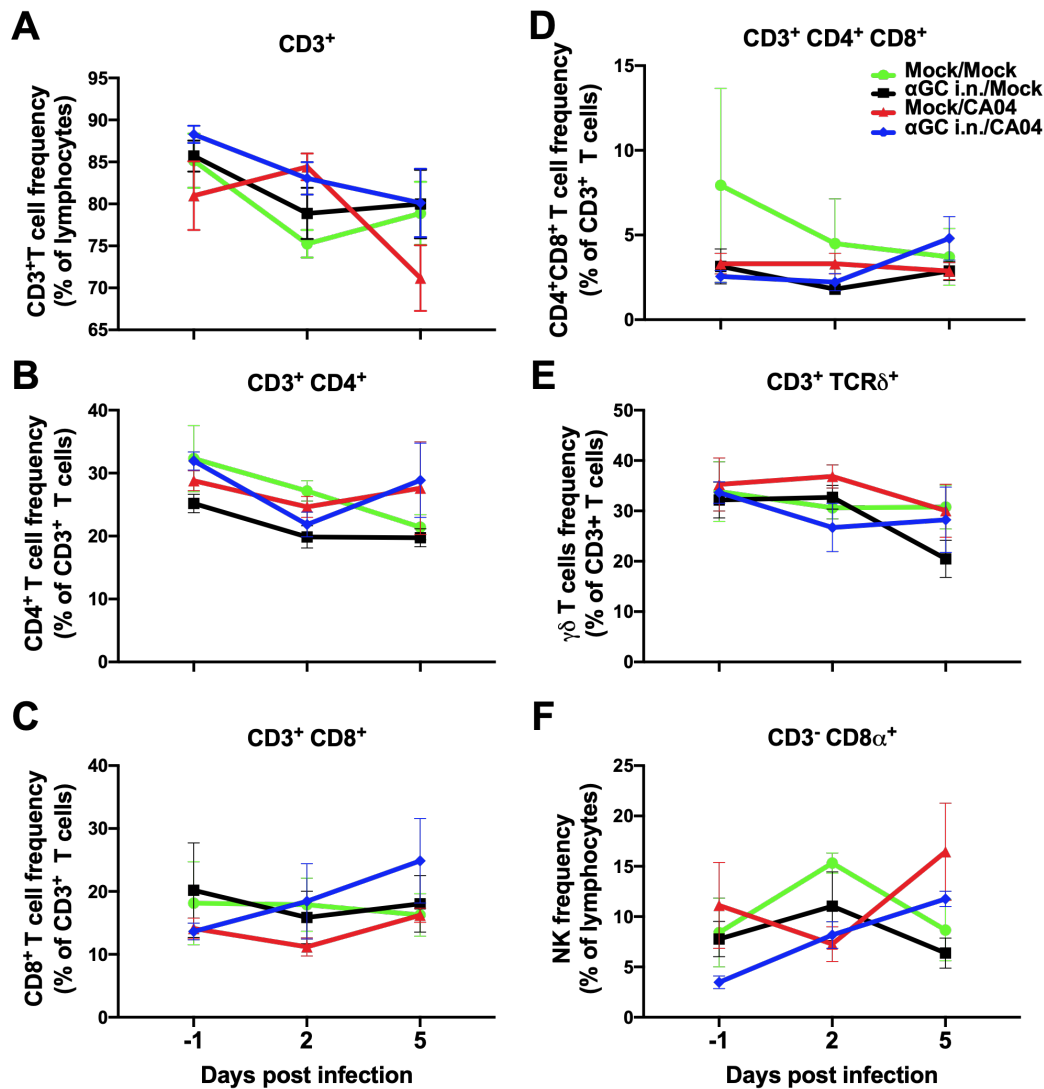

**Supplemental Figure 4.** Frequencies of immune cell populations in peripheral blood during Experiment 2 (A-F). (A) CD3<sup>+</sup> cells as a proportion of lymphocytes, (B) CD4<sup>+</sup> single positive T cells as a proportion of CD3<sup>+</sup> lymphocytes, (C) CD8α<sup>+</sup> single positive T cells as a proportion of CD3<sup>+</sup> lymphocytes, (D) double positive CD4<sup>+</sup> CD8α<sup>+</sup> T cells as a proportion of CD3<sup>+</sup> lymphocytes, (E) γδ T cells as a proportion of CD3<sup>+</sup> lymphocytes, (F) NK cells (CD3<sup>-</sup>CD8α<sup>+</sup>) as a proportion of lymphocytes. Data are presented as mean ± SEM. CD3<sup>+</sup> and γδ T cell frequencies were analyzed using a two-way ANOVA. Other cell types were compared at each time point using the non-parametric Kruskal-Wallis test. No statistical differences were identified.

**Supplemental Table 1. Reagents used for flow cytometric analysis**

| Antigen             | Clone        | Isotype              | Conjugation | Source            |
|---------------------|--------------|----------------------|-------------|-------------------|
| Live/Dead           | N/A          | N/A                  | APC-Cy7     | Invitrogen        |
| mCD1d tetramer      | N/A          | N/A                  | PE          | NIH Tetramer Core |
| Anti-CD3 $\epsilon$ | BB23-8E6-8C8 | Mouse IgG2a $\kappa$ | PE-Cy7      | BD Biosciences    |
| Anti-CD8 $\alpha$   | 76-2-11      | Mouse IgG2a $\kappa$ | Alexa488    | Southern Biotech  |
| Anti-CD4            | 74-12-4      | Mouse IgG2b $\kappa$ | PE          | Southern Biotech  |
| Anti-TCR $\delta$   | PGBL22A      | Mouse IgG1           | Alexa647    | WSU mAb Center    |
| Anti-CD14           | MIL2         | Mouse IgG2b          | Alexa488    | Bio-Rad           |
| Anti-CD172 $\alpha$ | 74-22-15A    | Mouse IgG2b $\kappa$ | PerCP       | BD Biosciences    |
| Anti-MHC class II   | H42A         | Mouse IgG2a $\kappa$ | Alexa647    | WSU mAb Center    |
| Anti-CD11b          | M1/70        | Rat IgG2b $\kappa$   | BV421       | Biolegend         |

**Supplemental Table 2. Frequency of leukocyte populations in BALF in pigs administered  $\alpha$ -GalCer 9 days before infection.**

| Cell type                                 | Mock/<br>Mock  | $\alpha$ GC i.m./<br>Mock | Mock/<br>CA04  | $\alpha$ GC i.m./<br>CA04 | $\alpha$ GC i.n./<br>CA04 |
|-------------------------------------------|----------------|---------------------------|----------------|---------------------------|---------------------------|
| CD3 <sup>+</sup> T cells                  | 75.9 $\pm$ 4.3 | 78.2 $\pm$ 1.4            | 68.8 $\pm$ 4.9 | 70.1 $\pm$ 4.5            | 74.7 $\pm$ 5.8            |
| CD4 <sup>+</sup> T cells                  | 13.4 $\pm$ 1.2 | 8.4 $\pm$ 0.9             | 8.9 $\pm$ 1.8  | 3.0 $\pm$ 5.9             | 9.0 $\pm$ 1.4             |
| CD8 <sup>+</sup> T cells                  | 58.1 $\pm$ 4.5 | 41.0 $\pm$ 6.8            | 48.1 $\pm$ 3.5 | 54.2 $\pm$ 4.5            | 48.1 $\pm$ 6.1            |
| CD4 <sup>+</sup> CD8 <sup>+</sup> T cells | 4.1 $\pm$ 0.9  | 0.8 $\pm$ 0.1             | 1.4 $\pm$ 0.3  | 3.2 $\pm$ 0.8             | 2.8 $\pm$ 0.5             |
| $\gamma\delta$ T cells                    | 10.8 $\pm$ 1.5 | 17.9 $\pm$ 2.9            | 12.3 $\pm$ 2.1 | 12.9 $\pm$ 0.9            | 13.1 $\pm$ 0.6            |
| NK cells                                  | 2.9 $\pm$ 0.9  | 0.7 $\pm$ 0.1             | 1.4 $\pm$ 0.4  | 3.6 $\pm$ 2.6             | 2.4 $\pm$ 1.6             |

**Supplemental Table 3. Frequency of leukocyte populations in lung in pigs administered  $\alpha$ -GalCer 9 days before infection.**

| Cell type                                 | Mock/<br>Mock | $\alpha$ GC i.m./<br>Mock | Mock/<br>CA04 | $\alpha$ GC i.m./<br>CA04 | $\alpha$ GC i.n./<br>CA04 |
|-------------------------------------------|---------------|---------------------------|---------------|---------------------------|---------------------------|
| CD3 <sup>+</sup> T cells                  | 69.2±1.6      | 65.5±1.9                  | 67.5±1.7      | 69.0±2.1                  | 66.0±3.3                  |
| CD4 <sup>+</sup> T cells                  | 13.7±2.4      | 10.9±1.5                  | 15.9±1.8      | 16.3±2.0                  | 16.3±2.7                  |
| CD8 <sup>+</sup> T cells                  | 68.0±5.1      | 65.2±4.7                  | 55.1±4.3      | 58.7±2.3                  | 58.9±6.1                  |
| CD4 <sup>+</sup> CD8 <sup>+</sup> T cells | 7.2±1.2       | 5.6±1.7                   | 8.1±2.3       | 10.2±1.4                  | 7.6±1.0                   |
| $\gamma\delta$ T cells                    | 11.7±1.0      | 14.4±1.9                  | 15.0±3.0      | 16.0±1.6                  | 19.1±4.7                  |
| NK cells                                  | 10.6±2.2      | 8.3±2.2                   | 7.2±1.7       | 10.2±0.8                  | 10.9±2.6                  |

**Supplemental Table 4. Frequency of leukocyte populations in spleen in pigs administered  $\alpha$ -GalCer 9 days before infection.**

| Cell type                                 | Mock/<br>Mock  | $\alpha$ GC i.m./<br>Mock | Mock/<br>CA04  | $\alpha$ GC i.m./<br>CA04 | $\alpha$ GC i.n./<br>CA04 |
|-------------------------------------------|----------------|---------------------------|----------------|---------------------------|---------------------------|
| CD3 <sup>+</sup> T cells                  | 74.4 $\pm$ 1.6 | 71.9 $\pm$ 2.5            | 75.2 $\pm$ 1.5 | 74.6 $\pm$ 3.6            | 75.6 $\pm$ 4.1            |
| CD4 <sup>+</sup> T cells                  | 13.7 $\pm$ 2.4 | 10.9 $\pm$ 1.5            | 15.9 $\pm$ 1.8 | 16.3 $\pm$ 2.0            | 16.3 $\pm$ 2.7            |
| CD8 <sup>+</sup> T cells                  | 25.7 $\pm$ 2.5 | 27.7 $\pm$ 3.6            | 18.5 $\pm$ 3.4 | 20.2 $\pm$ 2.3            | 23.4 $\pm$ 5.2            |
| CD4 <sup>+</sup> CD8 <sup>+</sup> T cells | 0.9 $\pm$ 0.1  | 1.0 $\pm$ 0.2             | 1.9 $\pm$ 0.6  | 1.8 $\pm$ 0.2             | 1.6 $\pm$ 0.2             |
| $\gamma\delta$ T cells                    | 15.3 $\pm$ 2.2 | 15.7 $\pm$ 1.4            | 17.7 $\pm$ 0.8 | 22.1 $\pm$ 4.2            | 21.5 $\pm$ 3.5            |
| NK cells                                  | 1.7 $\pm$ 0.2  | 2.7 $\pm$ 0.5             | 1.3 $\pm$ 0.5  | 1.1 $\pm$ 0.3             | 1.7 $\pm$ 0.4             |



**Supplemental Table 5. Frequency of leukocyte populations in TBLN in pigs administered  $\alpha$ -GalCer 9 days before infection.**

| Cell type                                 | Mock/<br>Mock  | $\alpha$ GC i.m./<br>Mock | Mock/<br>CA04  | $\alpha$ GC i.m./<br>CA04 | $\alpha$ GC i.n./<br>CA04 |
|-------------------------------------------|----------------|---------------------------|----------------|---------------------------|---------------------------|
| CD3 <sup>+</sup> T cells                  | 86.4 $\pm$ 1.8 | 82.2 $\pm$ 3.8            | 75.0 $\pm$ 2.2 | 79.7 $\pm$ 2.2            | 73.5 $\pm$ 2.5            |
| CD4 <sup>+</sup> T cells                  | 45.0 $\pm$ 1.3 | 52.4 $\pm$ 4.6            | 53.4 $\pm$ 2.2 | 51.4 $\pm$ 3.3            | 54.4 $\pm$ 2.5            |
| CD8 <sup>+</sup> T cells                  | 25.4 $\pm$ 2.3 | 24.9 $\pm$ 1.6            | 21.6 $\pm$ 1.0 | 21.3 $\pm$ 1.3            | 19.9 $\pm$ 1.9            |
| CD4 <sup>+</sup> CD8 <sup>+</sup> T cells | 4.1 $\pm$ 1.0  | 2.9 $\pm$ 0.4             | 1.5 $\pm$ 0.2  | 3.1 $\pm$ 0.8             | 2.1 $\pm$ 0.2             |
| $\gamma\delta$ T cells                    | 3.8 $\pm$ 0.8  | 5.0 $\pm$ 1.3             | 2.1 $\pm$ 0.3  | 5.1 $\pm$ 1.2             | 2.9 $\pm$ 0.6             |
| NK cells                                  | 1.5 $\pm$ 0.2  | 1.4 $\pm$ 0.2             | 0.8 $\pm$ 0.2  | 1.0 $\pm$ 0.2             | 0.7 $\pm$ 0.1             |

**Supplemental Table 6. Frequency of leukocyte populations in BALF in pigs administered  $\alpha$ -GalCer 2 days before infection.**

| Cell type                                 | Mock/<br>Mock  | $\alpha$ GC i.n./<br>Mock | Mock/<br>CA04  | $\alpha$ GC i.n./<br>CA04 |
|-------------------------------------------|----------------|---------------------------|----------------|---------------------------|
| CD3 <sup>+</sup> T cells                  | 60.5 $\pm$ 3.1 | 51.1 $\pm$ 6.5            | 54.9 $\pm$ 2.4 | 67.2 $\pm$ 4.5            |
| CD4 <sup>+</sup> T cells                  | 19.5 $\pm$ 4.5 | 15.2 $\pm$ 3.5            | 18.2 $\pm$ 2.3 | 19.9 $\pm$ 2.9            |
| CD8 <sup>+</sup> T cells                  | 29.3 $\pm$ 6.4 | 33.1 $\pm$ 7.6            | 37.8 $\pm$ 4.0 | 41.9 $\pm$ 5.5            |
| CD4 <sup>+</sup> CD8 <sup>+</sup> T cells | 3.0 $\pm$ 1.4  | 2.2 $\pm$ 0.5             | 3.3 $\pm$ 0.4  | 3.7 $\pm$ 0.7             |
| NK cells                                  | 9.4 $\pm$ 2.4  | 6.5 $\pm$ 0.9             | 10.5 $\pm$ 2.2 | 5.9 $\pm$ 1.1             |

**Supplemental Table 7. Frequency of leukocyte populations in lung in pigs administered  $\alpha$ -GalCer 2 days before infection.**

| Cell type                                 | Mock/<br>Mock   | $\alpha$ GC i.n./<br>Mock | Mock/<br>CA04  | $\alpha$ GC i.n./<br>CA04 |
|-------------------------------------------|-----------------|---------------------------|----------------|---------------------------|
| CD3 <sup>+</sup> T cells                  | 55.5 $\pm$ 2.8  | 54.2 $\pm$ 4.3            | 46.7 $\pm$ 1.9 | 57.6 $\pm$ 3.9            |
| CD4 <sup>+</sup> T cells                  | 23.3 $\pm$ 2.2  | 22.0 $\pm$ 2.8            | 24.5 $\pm$ 1.7 | 22.2 $\pm$ 2.5            |
| CD8 <sup>+</sup> T cells                  | 42.8 $\pm$ 10.6 | 42.0 $\pm$ 6.6            | 41.6 $\pm$ 5.2 | 51.2 $\pm$ 8.1            |
| CD4 <sup>+</sup> CD8 <sup>+</sup> T cells | 8.6 $\pm$ 3.8   | 7.7 $\pm$ 2.1             | 7.8 $\pm$ 1.5  | 8.5 $\pm$ 1.7             |
| $\gamma\delta$ T cells                    | 38.7 $\pm$ 8.4  | 40.0 $\pm$ 4.0            | 40.0 $\pm$ 2.5 | 33.0 $\pm$ 5.7            |
| NK cells                                  | 23.2 $\pm$ 1.3  | 22.3 $\pm$ 3.0            | 30.4 $\pm$ 1.4 | 23.4 $\pm$ 1.7            |

**Supplemental Table 8. Frequency of leukocyte populations in spleen in pigs administered  $\alpha$ -GalCer 2 days before infection.**

| Cell type                                 | Mock/<br>Mock  | $\alpha$ GC i.n./<br>Mock | Mock/<br>CA04  | $\alpha$ GC i.n./<br>CA04 |
|-------------------------------------------|----------------|---------------------------|----------------|---------------------------|
| CD3 <sup>+</sup> T cells                  | 68.0 $\pm$ 1.4 | 66.2 $\pm$ 2.0            | 65.1 $\pm$ 3.0 | 67.5 $\pm$ 2.6            |
| CD4 <sup>+</sup> T cells                  | 23.3 $\pm$ 4.7 | 15.5 $\pm$ 3.0            | 20.6 $\pm$ 2.3 | 20.5 $\pm$ 1.4            |
| CD8 <sup>+</sup> T cells                  | 18.1 $\pm$ 5.2 | 14.3 $\pm$ 3.7            | 15.4 $\pm$ 1.5 | 22.7 $\pm$ 5.3            |
| CD4 <sup>+</sup> CD8 <sup>+</sup> T cells | 2.0 $\pm$ 1.1  | 1.0 $\pm$ 0.4             | 1.1 $\pm$ 0.2  | 1.7 $\pm$ 0.5             |
| $\gamma\delta$ T cells                    | 34.9 $\pm$ 6.7 | 35.0 $\pm$ 3.1            | 33.0 $\pm$ 3.6 | 33.0 $\pm$ 4.5            |
| NK cells                                  | 4.2 $\pm$ 0.8  | 2.2 $\pm$ 0.6             | 5.3 $\pm$ 1.1  | 3.4 $\pm$ 0.8             |

**Supplemental Table 9. Frequency of leukocyte populations in TBLN in pigs administered  $\alpha$ -GalCer 2 days before infection.**

| Cell type                                 | Mock/<br>Mock  | $\alpha$ GC i.n./<br>Mock | Mock/<br>CA04  | $\alpha$ GC i.n./<br>CA04 |
|-------------------------------------------|----------------|---------------------------|----------------|---------------------------|
| CD3 <sup>+</sup> T cells                  | 91.4 $\pm$ 1.8 | 94.0 $\pm$ 0.4            | 89.3 $\pm$ 2.7 | 87.6 $\pm$ 3.8            |
| CD4 <sup>+</sup> T cells                  | 60.0 $\pm$ 5.1 | 48.9 $\pm$ 10.4           | 51.4 $\pm$ 6.6 | 50.7 $\pm$ 5.4            |
| CD8 <sup>+</sup> T cells                  | 21.0 $\pm$ 4.0 | 24.7 $\pm$ 3.0            | 30.0 $\pm$ 2.2 | 28.8 $\pm$ 1.4            |
| CD4 <sup>+</sup> CD8 <sup>+</sup> T cells | 3.6 $\pm$ 0.9  | 3.3 $\pm$ 0.6             | 3.1 $\pm$ 0.4  | 3.3 $\pm$ 0.5             |
| $\gamma\delta$ T cells                    | 7.1 $\pm$ 0.2  | 8.5 $\pm$ 1.2             | 5.2 $\pm$ 1.1  | 4.5 $\pm$ 0.7             |
| NK cells                                  | 1.4 $\pm$ 0.4  | 1.5 $\pm$ 0.3             | 1.0 $\pm$ 0.4  | 1.0 $\pm$ 0.1             |
